# Supplementary figures and images for: Therapeutic potential of Fingolimod in triple negative breast cancer preclinical models
Source: PubMed Central journal article supplement — Transl Oncol. 2020 Nov 3;14(1):100926. doi: 10.1016/j.tranon.2020.100926 (PMC7649527; doi:10.1016/j.tranon.2020.100926), 2020-11-03

# Figure S1

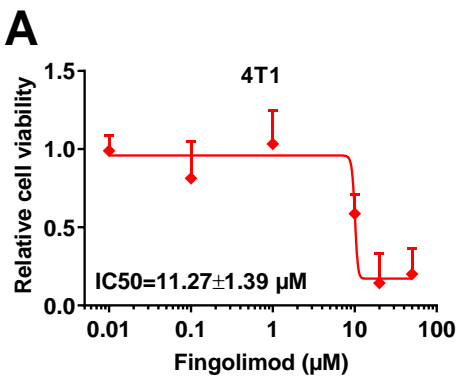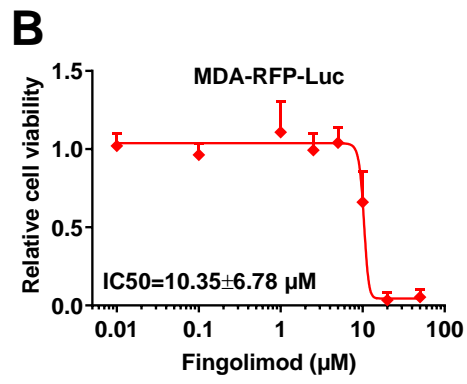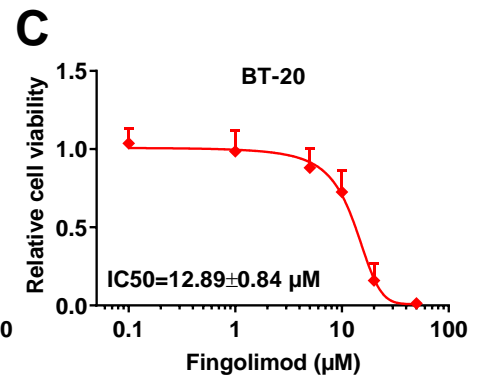

Supplement: mmc1.pdf [file mmc1.pdf]

**Figure S2**

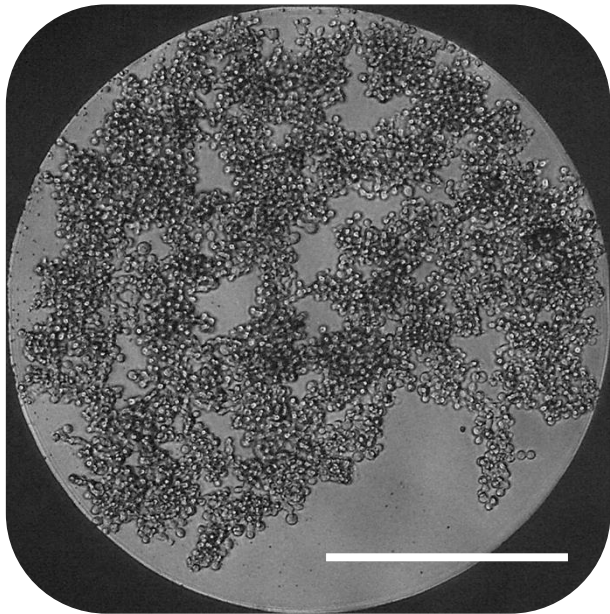

Supplement: mmc2.pdf [file mmc2.pdf]

# Figure S3

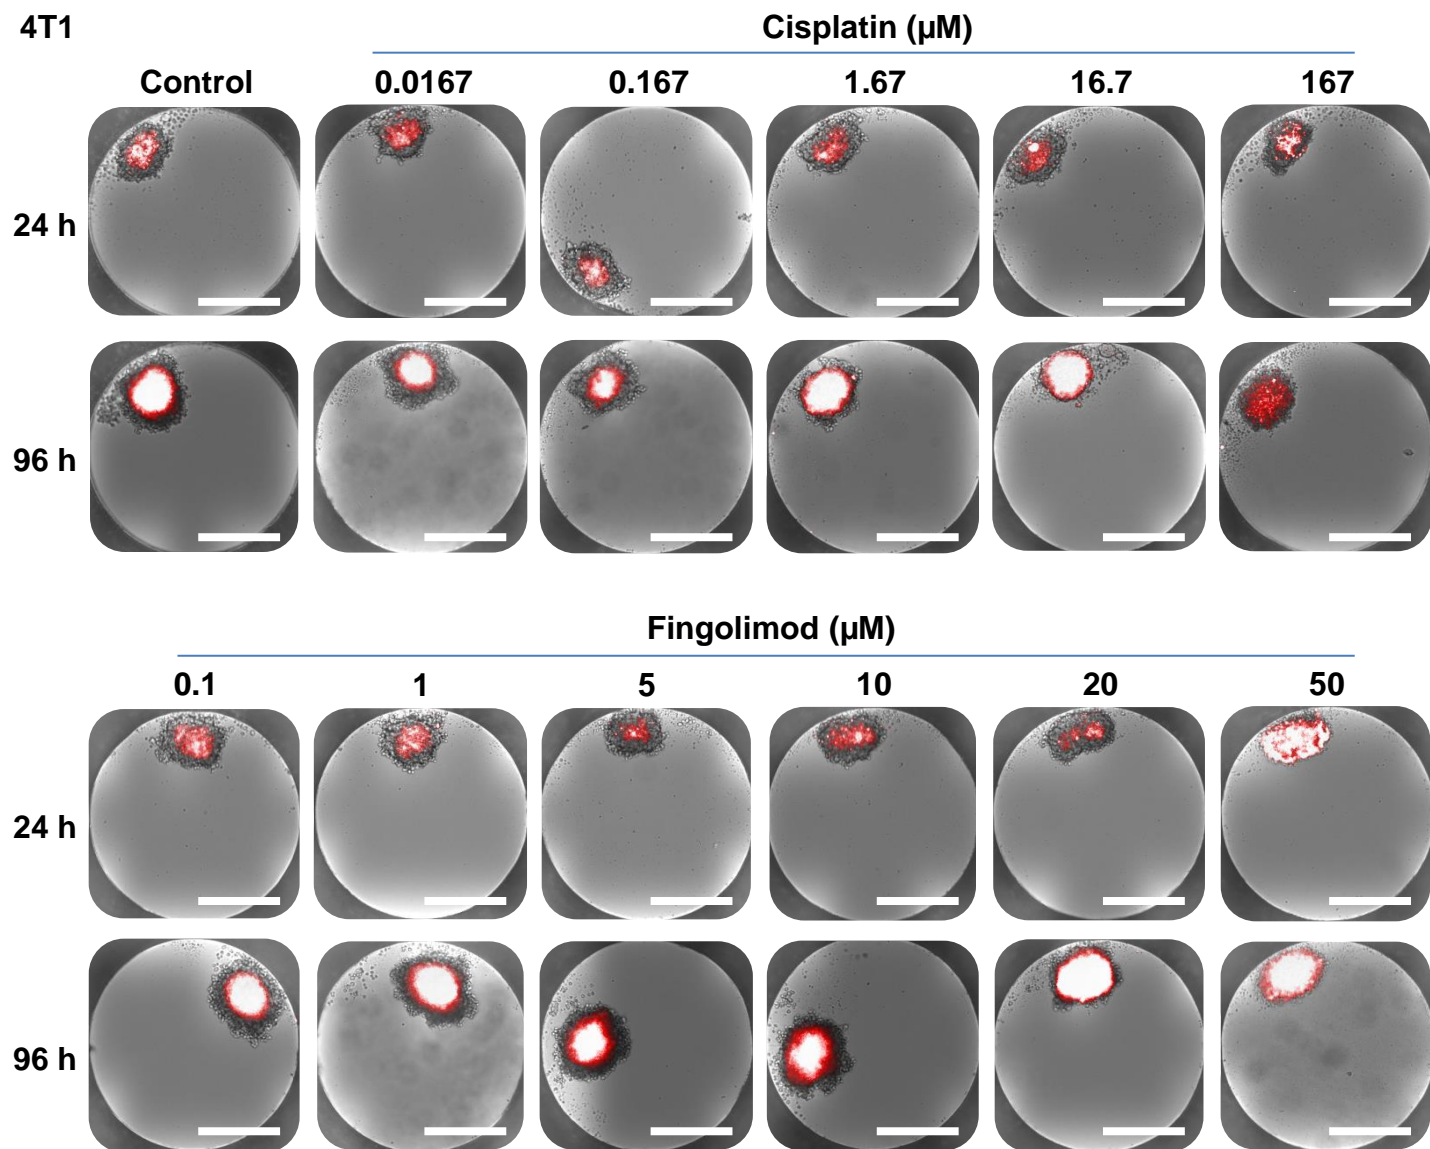

Supplement: mmc3.pdf [file mmc3.pdf]

# Figure S4

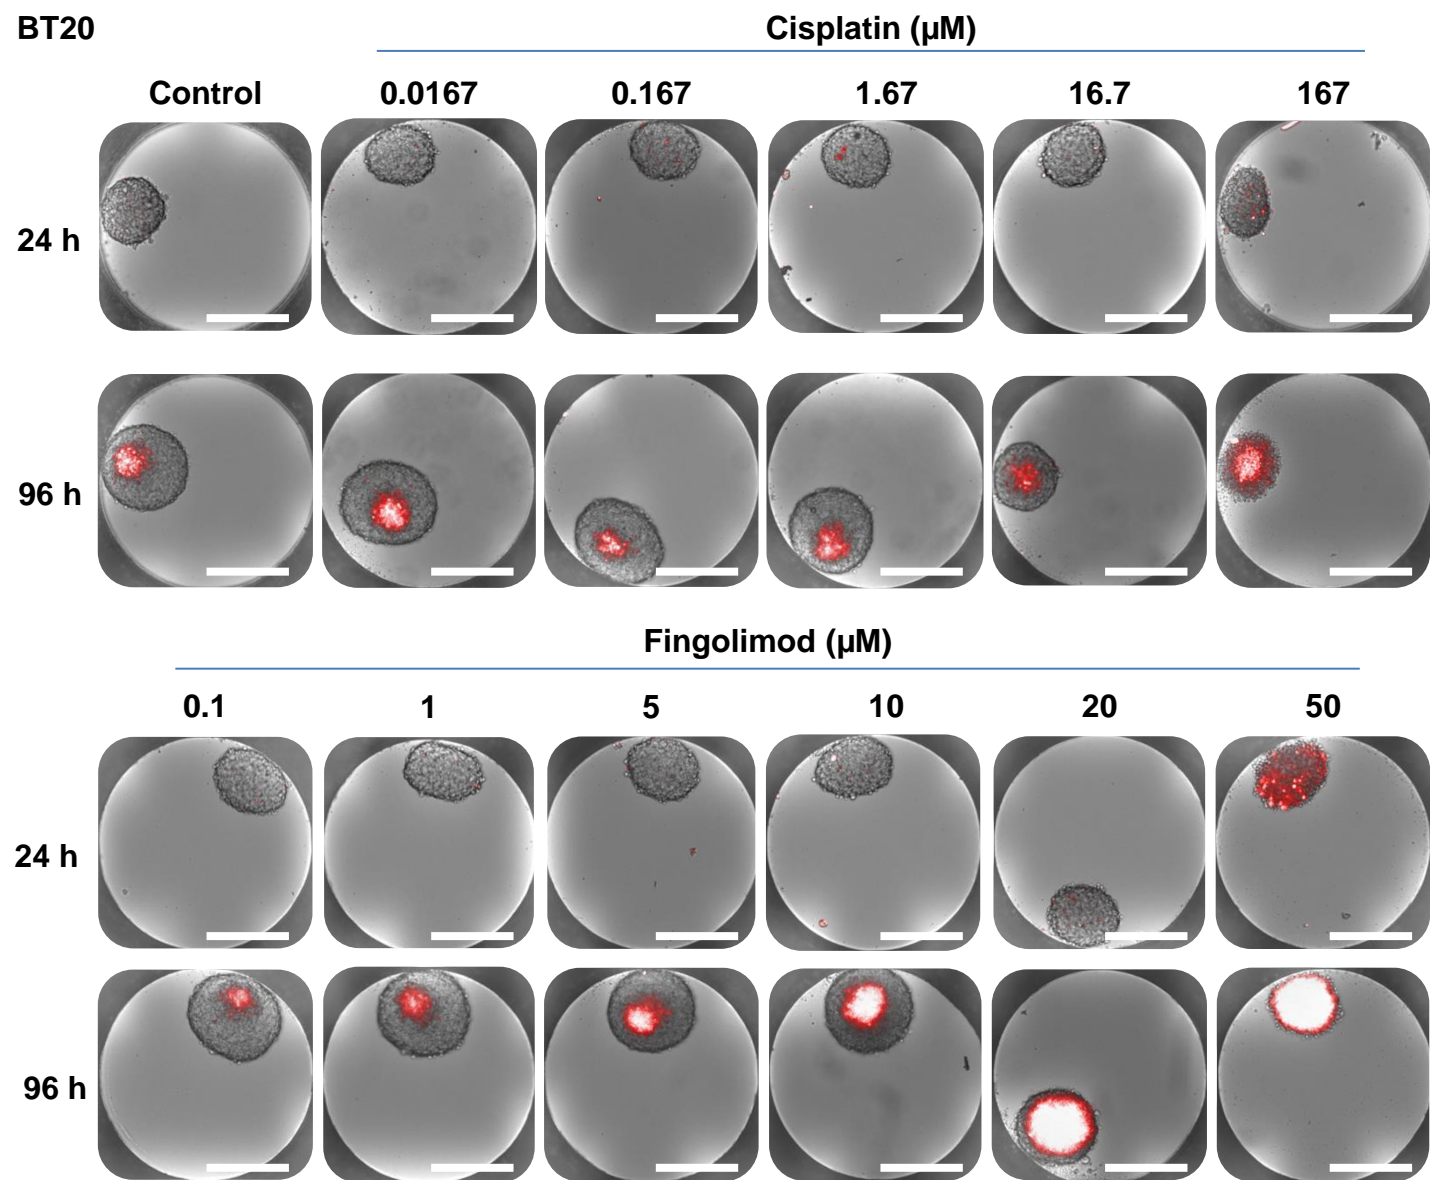

Supplement: mmc4.pdf [file mmc4.pdf]

# Figure S5

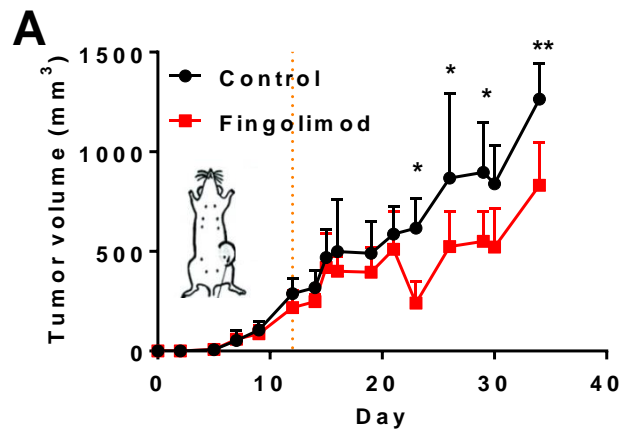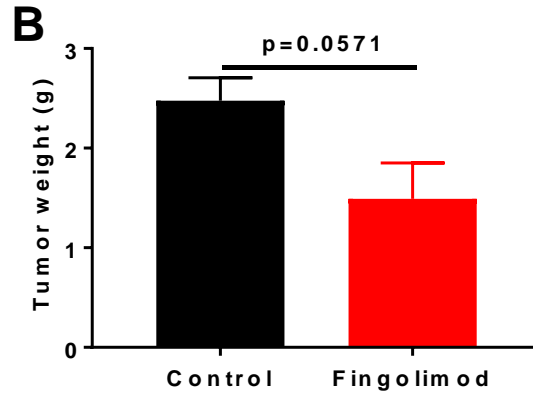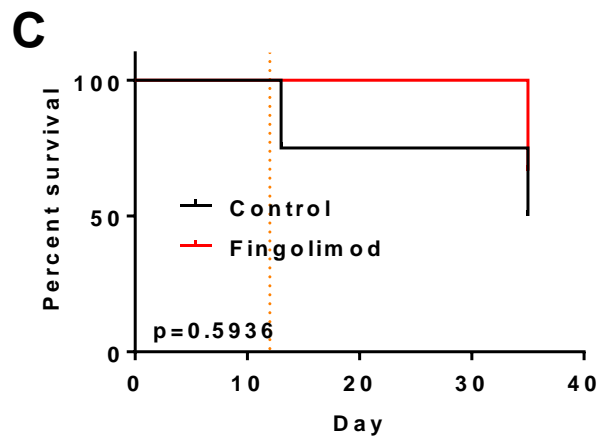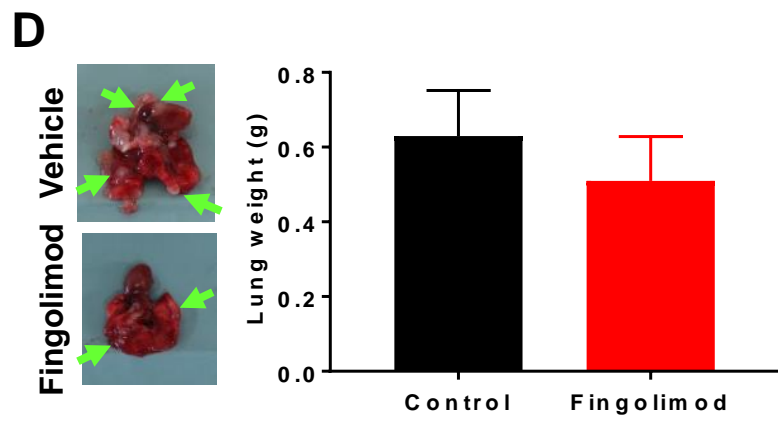

Supplement: mmc5.pdf [file mmc5.pdf]

Figure S6

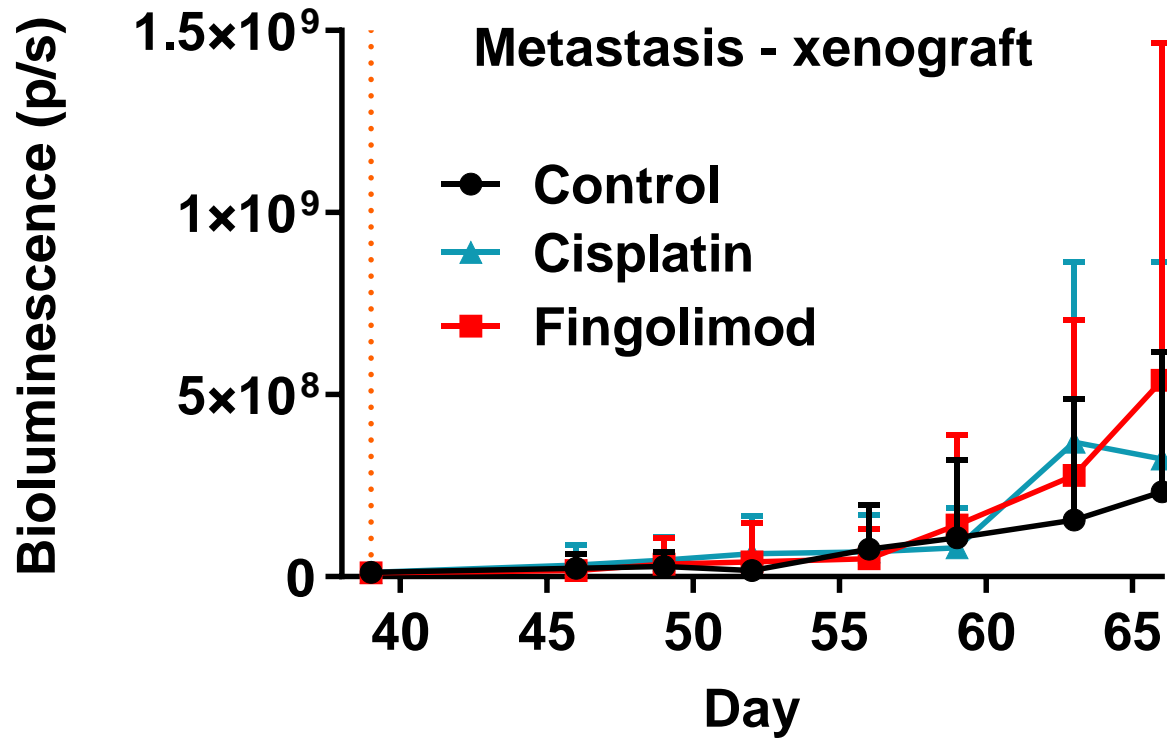

Supplement: mmc6.pdf [file mmc6.pdf]

# Figure S7

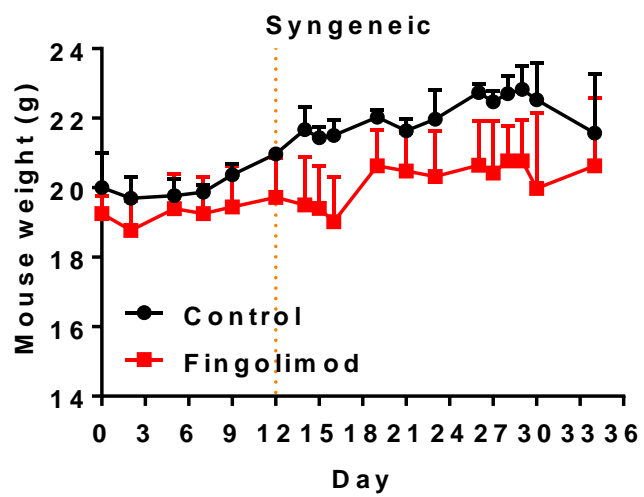

Supplement: mmc7.pdf [file mmc7.pdf]
